# Supplementary material for: Characteristics of a Nationwide Voluntary Antibiotic Resistance Awareness Campaign in India; Future Paths and Pointers for Resource Limited Settings/Low and Middle Income Countries
Source: Int J Environ Res Public Health. 2019 Dec 16;16(24):5141. doi: 10.3390/ijerph16245141 (PMC6950494; doi:10.3390/ijerph16245141)
Supplement: Supplementary file 1 [file ijerph-16-05141-s001.zip]

Archive with 6 entries (6 files):
- Suppl Audio S 1 English AMRAC-17 Take antibiotics as prescribed by doctor.mp3
- Suppl Doc S 1 AMRAC-17 Instructions for Antibiotic Awareness Day procedure.docx
- Suppl Doc S 2 AMRAC-17 Questionnaire for programme coordinators.pdf
- Suppl Figure S 1 AMRAC-17 Posters in Campaign.docx
- Suppl Figure S 2 AMRAC-17 Foldable Pamphlets.docx
- Supplementary video S1 How to perform _Alcoholic_Hand rub_mpeg4.mp4
